# Supplementary material for: Mesolimbic dopamine ramps reflect environmental timescales
Source: PubMed Central journal article supplement — bioRxiv. 2025 May 12:2024.03.27.587103. Preprint. [Version 5] doi: 10.1101/2024.03.27.587103 (PMC11042231; doi:10.1101/2024.03.27.587103), 2025-05-12
Supplement: NIHPP2024.03.27.587103v3-supplement-1.pdf [file NIHPP2024.03.27.587103v3-supplement-1.pdf]

## Supplementary Notes

**Note 1: Setting of eligibility trace time constant.** It is intuitively clear that the eligibility trace time constant  $T$  needs to be set to match the timescales operating in the environment. This is because if the eligibility trace decays too quickly, there will be no memory of past events, and if it decays too slowly, it will take a long time to correctly learn event rates in the environment. Further, the asymptotic value of the baseline memory trace of event  $x$ ,  $M_{\leftarrow x}$  for an event train at a constant rate  $\lambda_x$  with average period  $t_x$  is  $T/t_x = T\lambda_x$ . This means that the neural representation of  $M_{\leftarrow x}$  will need to be very high if  $T$  is very high and very low if  $T$  is very low. Since every known neural encoding scheme is non-linear at its limits with a floor and ceiling effect (e.g., firing rates can't be below zero or be infinitely high), the limited neural resource in the linear regime should be used appropriately for efficient coding. A linear regime of operation for  $M_{\leftarrow x}$  is especially important in ANCCR since the estimation of the successor representation by Bayes' rule depends on the ratio of  $M_{\leftarrow x}$  for different event types. Such a ratio will be highly biased if the neural representation of  $M_{\leftarrow x}$  is in its non-linear range. Assuming without loss of generality that the optimal value of  $M_{\leftarrow x}$  is  $M_{opt}$  for efficient linear coding, we can define a simple optimality criterion for the eligibility trace time constant  $T$ . Specifically, we postulate that the net sum of squared deviations of  $M_{\leftarrow x}$  from  $M_{opt}$  for all event types should be minimized at the optimal  $T$ . The net sum of squared deviations, denoted by  $SS$ , can be written as

$$SS = \sum_x (M_{\leftarrow x} - M_{opt})^2 = \sum_x (T\lambda_x - M_{opt})^2 \quad (5)$$

Where the second equality assumes asymptotic values of  $M_{\leftarrow x}$ . The minimum of  $SS$  with respect to  $T$  will occur when  $\frac{\partial SS}{\partial T} = 0$ . It is easy to show that this means that the optimal  $T$  is:

$$T_{opt} = M_{opt} \frac{\sum_x \lambda_x}{\sum_x \lambda_x^2} \quad (6)$$

For typical cue-reward experiments with each cue predicting reward at 100% probability,  $\lambda_{cue} = \lambda_{reward} = \frac{1}{IRI}$ . Substituting into the above equation, we get:

$$T_{opt} = M_{opt} \cdot IRI \quad (7)$$

Thus, in typical experiments with 100% reward probability, the eligibility trace time constant should be proportional to the IRI or the total trial duration, which is determined by the ITI—the experimental proxy that we manipulate. Please do note, however, that the above relationship is not strictly controlled by the ITI, but by the frequency of repeating events in the environment (i.e., environmental timescale).

**Note 2: Higher cue-offset induced anticipatory licking with short ITI.** We observed empirically that the animals showed higher anticipatory licking following cue offset (i.e., 8 seconds after cue onset) during the short ITI condition compared to the long ITI condition (Fig 1f) (though this is only weakly significant). We believe that this simply reflects the fact that the cue onset is relatively much farther to reward delivery compared to the inter-cue interval during the short ITI condition compared to the long ITI condition (ratio of 9s to 9+8s in short ITI vs 9s to 9+55s in the long ITI). Therefore, in the short ITI condition, the cue offset provides a stronger signal indicating relative proximity to reward.

**Note 3: The implications of assuming that internal states may serve the role of external cues in ANCCR.** Some readers will note that we have previously argued against the assumption of internal states serving the role of externally signaled events in learning theories(46). It may therefore seem that our speculation that internal states can serve this role during timing tasks is problematic. However, there is a critical difference between our earlier position and the current speculation. Our earlier position was that assuming fixed internal states that pre-exist and provide a scaffold for learning, such as in temporal difference learning, is problematic. This is because these pre-existing states would need to already incorporate information that can only be acquired during the course of learning. Unlike this position, here we are merely speculating that after learning, an internal progression of states can serve the function of externally signaled events. Similarly, we have previously postulated that such an internal state exists during omission of a predicted reward, but only after learning of the cue-reward association.

**Note 4: Some discrepancies between ANCCR simulations and experiments.** We performed the ANCCR simulations not to explicitly fit the experiments, but to motivate them. Accordingly, there are many details of the experimental conditions that we did not include in the simulations. First, animals were trained initially using a long (Pavlovian) or medium ITI (VR), thereby establishing that the cue onset is a meaningful event before switching to the short ITI. Second, animals are unlikely to discriminate each change in tone frequency in the dynamic tone (80 Hz every 200 ms). Thus, we simplified the simulation and used a 1 s interval between sensory cues under the assumption that 400 Hz would be discriminable. The potential sensory noise in detection of frequency changes was not modeled in the simulation. Third, we did not explicitly model potential trial-by-trial changes in eligibility trace time constant, sensory noise, or internal threshold. Fourth, we did not simulate any biophysical mechanisms controlling dopamine release, or sensor dynamics. Thus, we did not expect to capture all experimental observations

in the motivating simulation. One particular discrepancy is worth noting: the cue onset response in the short ITI condition is small but positive in the experiment but negative in ANCCR. This may potentially reflect the fact that the cue onset was already learned to be meaningful prior to the short ITI experiment.

## Supplementary Table 1: Statistical Details.

| Figure | Description                                                               | Test                                            | Statistic                                                         | p value                                                                                                                                                         | Sample size     |
|--------|---------------------------------------------------------------------------|-------------------------------------------------|-------------------------------------------------------------------|-----------------------------------------------------------------------------------------------------------------------------------------------------------------|-----------------|
| 1g     | Anticipatory lick rate across ITI (long, short) and tone (fixed, dynamic) | Two-way ANOVA                                   | ITI: F(1) = 9.30<br>Tone: F(1) = 0.30<br>ITI x Tone: F(1) = 0.029 | ITI: **p = 0.00457<br>Tone: p = 0.586<br>ITI x Tone: p = 0.865                                                                                                  | n = 9 mice      |
| 1j     | Cue onset peak dLight between conditions (LD, SD)                         | Paired t-test                                   | t(8) = 6.31                                                       | ***p = $2.31 \times 10^{-4}$                                                                                                                                    | n = 9 mice      |
| 1l     | Slope between days (LD condition last day, SD condition first day)        | One-sided (LD < SD) paired t-test               | t(8) = -2.07                                                      | *p = 0.0363                                                                                                                                                     | n = 9 mice      |
| 1l     | Slope between days (SD condition last day, SF condition first day)        | One-sided (SD > SF) paired t-test               | t(8) = 2.35                                                       | *p = 0.0233                                                                                                                                                     | n = 9 mice      |
| 1m     | Slope across conditions (LF, LD, SD, SF)                                  | One-way ANOVA                                   | F(3) = 8.89                                                       | ***p = $1.98 \times 10^{-4}$                                                                                                                                    | n = 9 mice      |
| 1m     | Slope across conditions (LF, LD, SD, SF)                                  | Tukey HSD test for multiple comparison of means | q = 3.83                                                          | LD vs LF: p = 0.762<br>LD vs SD: **p = 0.00266<br>LD vs SF: p = 0.952<br>LF vs SD: ***p = $1.70 \times 10^{-4}$<br>LF vs SF: p = 0.445<br>SD vs SF: *p = 0.0107 | n = 9 mice      |
| 2b     | Trial slope regression $\beta$ given previous ITI (SD condition only)     | One-sided (< 0) one sample t-test               | t(8) = -2.17                                                      | *p = 0.0308                                                                                                                                                     | n = 9 mice      |
| 2c     | Trial slope given previous ITI (SD condition only)                        | Linear regression                               | t(2671) = -4.13<br>R <sup>2</sup> = 0.00634                       | ***p = $3.77 \times 10^{-5}$                                                                                                                                    | n = 2672 trials |
| 3e     | Change in velocity at trial onset (long ITI condition only)               | One-sided (> 0) one sample t-test               | t(8) = 6.40                                                       | ***p = $1.05 \times 10^{-4}$                                                                                                                                    | n = 9 mice      |
| 3e     | Change in velocity at trial onset (short ITI condition only)              | One-sided (> 0) one sample t-test               | t(8) = 7.93                                                       | ***p = $2.33 \times 10^{-5}$                                                                                                                                    | n = 9 mice      |
| 3e     | Change in velocity at trial onset between conditions (long, short)        | Paired t-test                                   | t(8) = 4.25                                                       | **p = 0.00281                                                                                                                                                   | n = 9 mice      |
| 3g     | Pre-reward velocity between conditions (long, short)                      | Paired t-test                                   | t(8) = 0.71                                                       | p = 0.497                                                                                                                                                       | n = 9 mice      |
| 3i     | Cue onset peak dLight between conditions (long, short)                    | Paired t-test                                   | t(8) = 7.59                                                       | ***p = $6.34 \times 10^{-5}$                                                                                                                                    | n = 9 mice      |
| 3l     | Session slope given session IRI (both long and short ITI conditions)      | Linear regression                               | t(53) = -2.61<br>R <sup>2</sup> = 0.116                           | *p = 0.0118                                                                                                                                                     | n = 54 sessions |
| 3m     | Slope between conditions (long, short)                                    | One-sided (long < short) paired t-test          | t(8) = -2.09                                                      | *p = 0.0349                                                                                                                                                     | n = 9 mice      |

| Figure | Description                                                                  | Test                                  | Statistic                                       | p value          | Sample size       |
|--------|------------------------------------------------------------------------------|---------------------------------------|-------------------------------------------------|------------------|-------------------|
| Ext 2d | Lick rate during ramp window across conditions (LF, LD, SD, SF)              | One-way ANOVA                         | $F(3) = 0.81$                                   | $p = 0.498$      | $n = 9$ mice      |
| Ext 3b | Trial slope regression $\beta$ given previous ITI (LD condition only)        | One-sided ( $< 0$ ) one sample t-test | $t(8) = 0.36$                                   | $p = 0.637$      | $n = 9$ mice      |
| Ext 3c | Trial slope given previous ITI (LD condition only)                           | Linear regression                     | $t(1050) = 0.64$<br>$R^2 = 3.85 \times 10^{-4}$ | $p = 0.525$      | $n = 1051$ trials |
| Ext 4c | Trial duration between conditions (long, short)                              | Paired t-test                         | $t(8) = 1.02$                                   | $p = 0.336$      | $n = 9$ mice      |
| Ext 4e | Anticipatory lick rate (long ITI condition only)                             | One-sided ( $> 0$ ) one sample t-test | $t(8) = 2.89$                                   | * $p = 0.0101$   | $n = 9$ mice      |
| Ext 4e | Anticipatory lick rate (short ITI condition only)                            | One-sided ( $> 0$ ) one sample t-test | $t(8) = 4.38$                                   | ** $p = 0.00118$ | $n = 9$ mice      |
| Ext 4e | Anticipatory lick rate between conditions (long, short)                      | Paired t-test                         | $t(8) = 1.08$                                   | $p = 0.311$      | $n = 9$ mice      |
| Ext 5b | Trial slope regression $\beta$ given previous IRI (short ITI condition only) | One-sided ( $< 0$ ) one sample t-test | $t(8) = -0.48$                                  | $p = 0.321$      | $n = 9$ mice      |
| Ext 5c | Trial slope given previous IRI (short ITI condition only)                    | Linear regression                     | $t(1301) = -2.11$<br>$R^2 = 0.00339$            | * $p = 0.0355$   | $n = 1302$ trials |

**Table 1.** Statistical Details.
